# Supplementary material for: Protocol for isolating amnion cells from human and non-human primate placenta for flow cytometry and transcriptomics
Source: PubMed Central journal article supplement — STAR Protoc. 2024 Apr 27;5(2):103044. doi: 10.1016/j.xpro.2024.103044 (PMC11068923; doi:10.1016/j.xpro.2024.103044), 2024-04-27
Supplement: mmc1.pdf [file mmc1.pdf]

## Supplementary Figure 1.

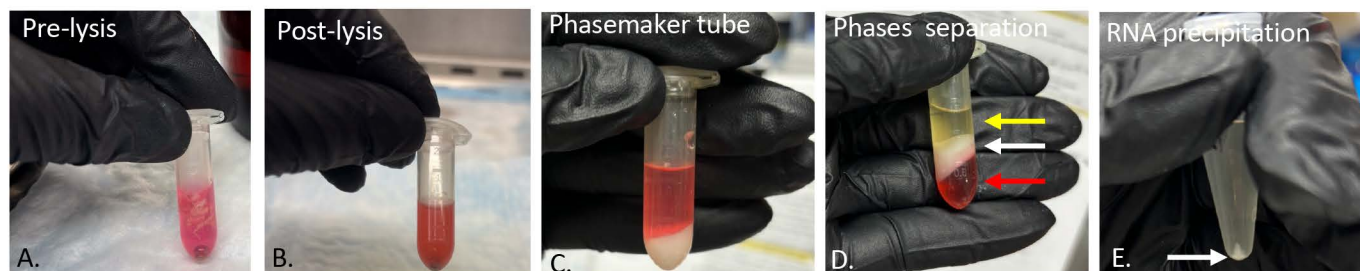

### Supplementary Figure 1. [RNA extraction], Related to Steps 33-44

(A) Transfer the minced amnion in a 2 ml sterile tube with 2 steel beads and add Trizol.

(B) Complete lysis of the amnion after using the tissue lyser.

(C) Transfer the solution in the Phasemaker Tube.

(D) After chloroform and centrifugation, three phases are clearly visible: a colorless upper phase (yellow arrow) containing RNA, an interphase (white arrow), and a lower red phenol-chloroform phase (red arrow).

(E) RNA is visible at the bottom of the tube (white arrow).
